# Supplementary material for: Bioinspired High-Strength Montmorillonite-Alginate Hybrid Film: The Effect of Different Divalent Metal Cation Crosslinking
Source: MDPI journal article supplement (doi:10.3390/polym14122433), 2022-06-16
Supplement: s1 [file s1]

# **Bioinspired high-strength montmorillonite-alginate hybrid film: the effect of different divalent metal cation crosslinking**

Jiaen Wang<sup>1</sup>, Tianliang Song<sup>1</sup>, Huaxiang Chen<sup>2</sup>, Wei Ming<sup>1</sup>, Zhiming Cheng<sup>1</sup>, Jingwen Liu<sup>3</sup>, Benliang Liang<sup>1\*</sup>, Yuting Wang<sup>3\*</sup> and Guangsheng Wang<sup>3</sup>

1. School of Physical Science and Engineering, Beijing Jiaotong University, Beijing 100044, China.

2. Petrochemical Research Institute, PetroChina, Beijing, 102200, China.

3. Key Laboratory of Bio-inspired Smart Interfacial Science and Technology of Ministry of Education, School of Chemistry, Beihang University, Beijing, 100191, China.

**Corresponding author(s):** Benliang Liang (blliang@bjtu.edu.cn.) and Yuting Wang (wangyt@buaa.edu.cn)

## 1. EDS mapping analysis of the composites

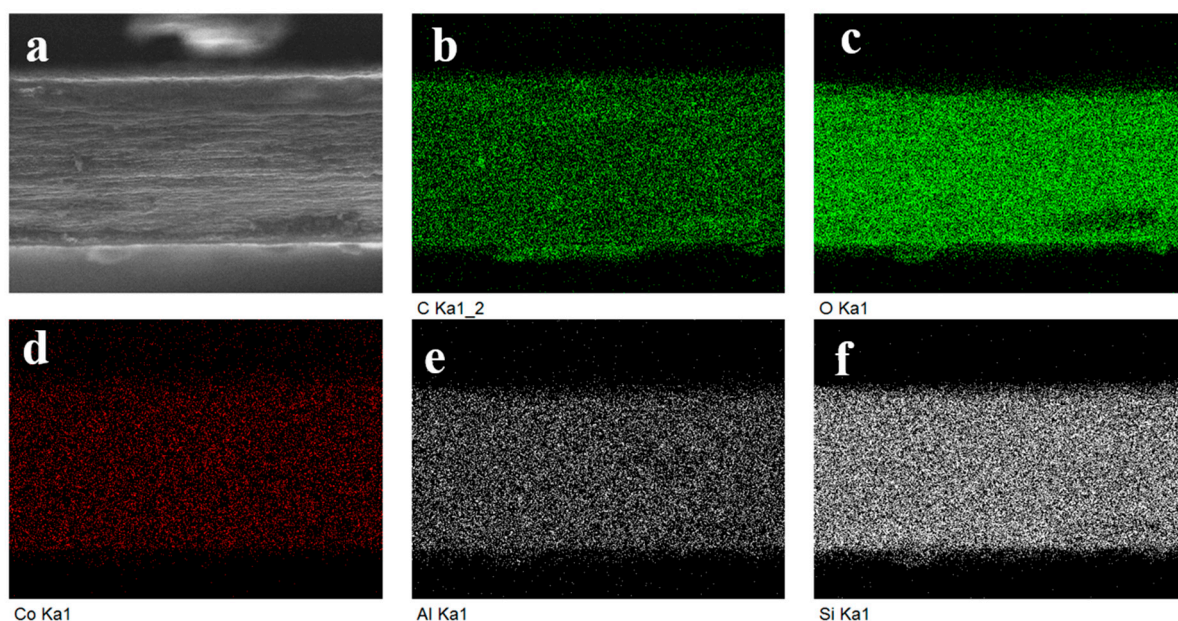

**Figure S1.** EDS mapping of the MMT-CS-Co<sup>2+</sup> composites. (a) shows the SEM images of the cross-sectional view for MMT-CS-Co<sup>2+</sup> samples; (b)–(f) shows the distribution of show the distribution of C, O, Co, Al, Si indicating the MMT, ALG and Co element were dispersed homogeneously in the composites.

## 2. TGA analysis of the composites

The TGA results for MMT powder, ALG film and various MMT-ALG nacre-like film are illustrated in Figure S2. All MMT-ALG-X<sup>2+</sup> films showed higher residues than pure ALG.

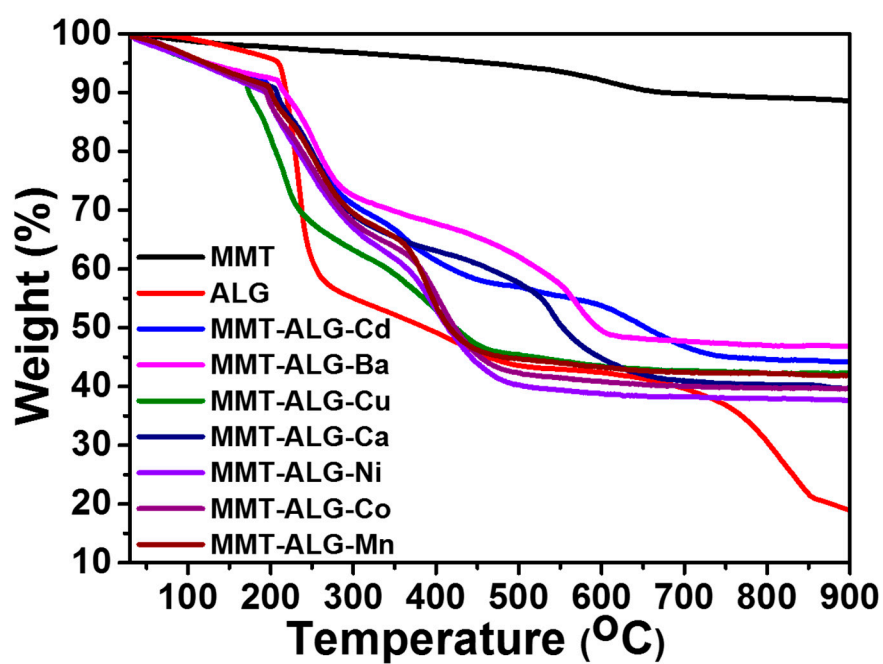

**Figure S2.** TGA results for MMT powder, ALG film and various MMT-ALG- $X^{2+}$  nacre-like film

### 3. The photograph of different divalent cations solution and ALG- $X^{2+}$

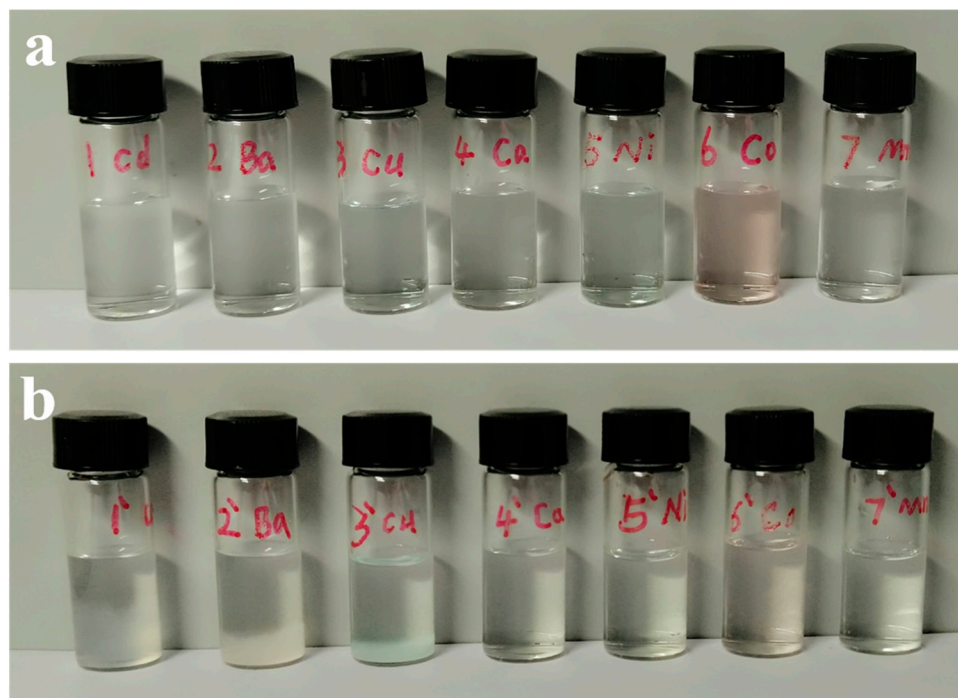

**Figure S3.** The photograph of different divalent cations solution (a) and ALG- $X^{2+}$  solution(b).



**4 SEM images of the cross sections of different composites.**

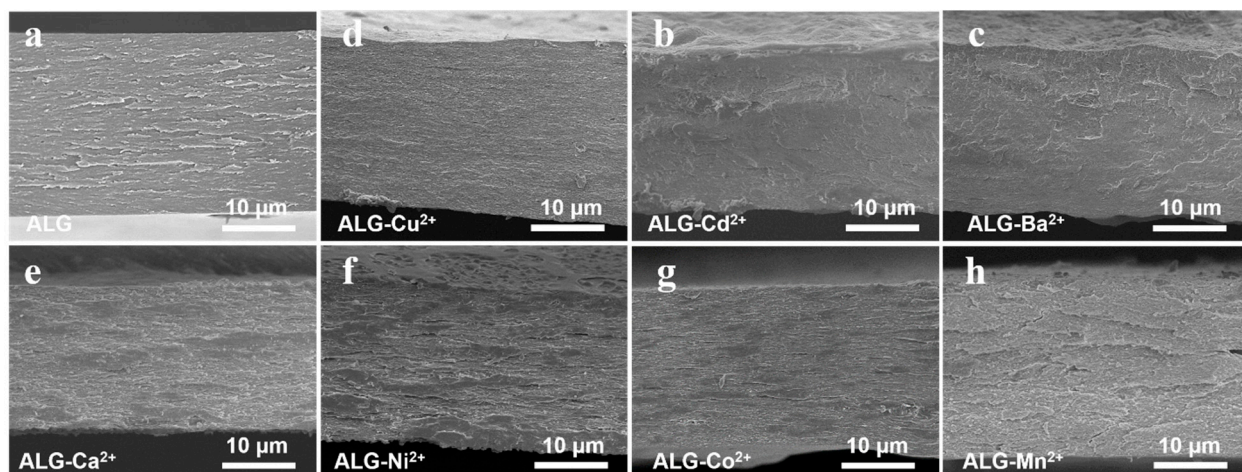

**Figure S4.** SEM images with low magnification of the ALG and ALG -  $X^{2+}$  composites

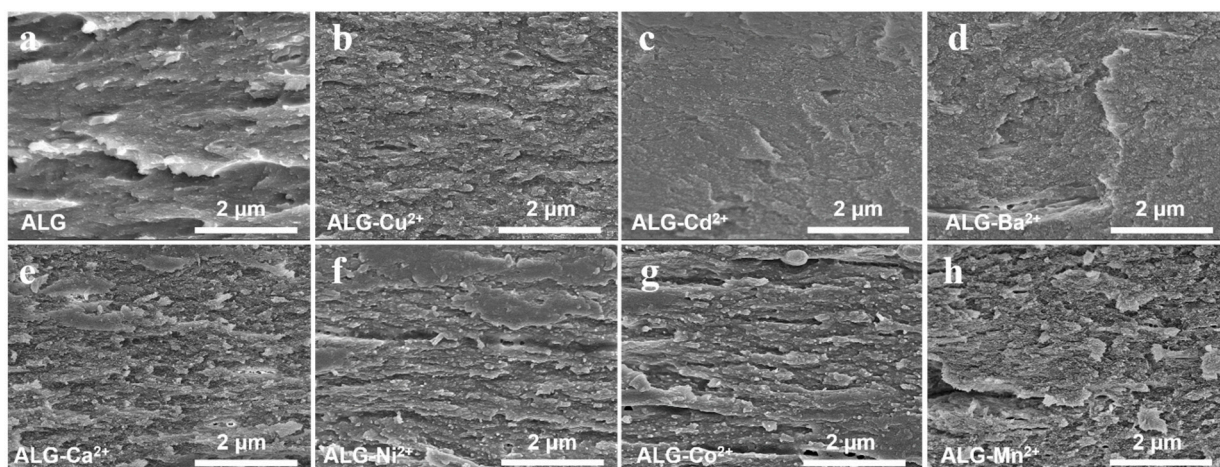

**Figure S5.** SEM images with high magnification of the of ALG and ALG -  $X^{2+}$  composite.

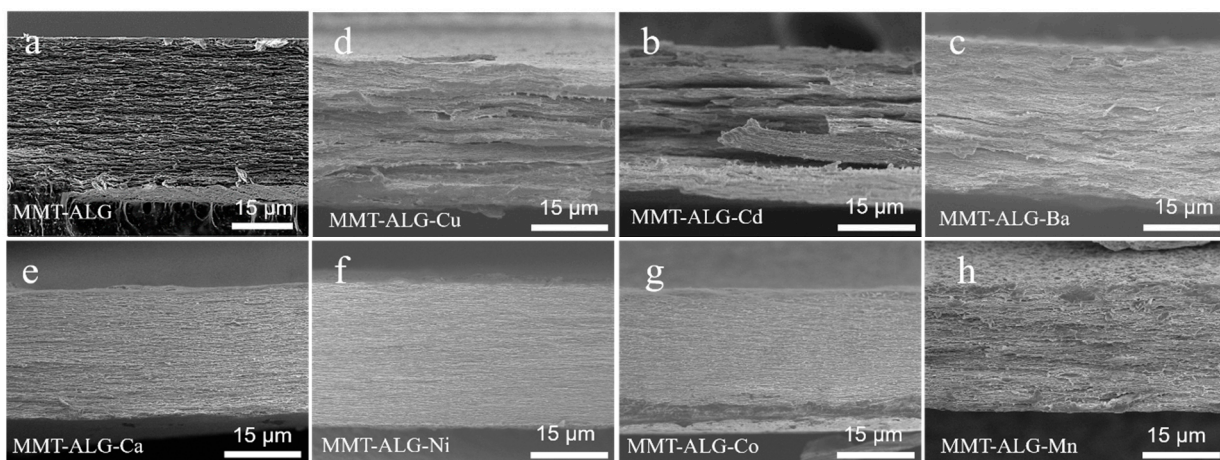

**Figure S6.** SEM images with low magnification of the MMT - ALG and MMT - ALG -  $X^{2+}$  composites

**Table S1.** Comparison of mechanical and optical performances of polymeric mica film with other nanoclay-based biomimetic films.

| <b>Materials</b>         | <b>Strength (MPa)</b> | <b>400-800 nm</b> | <b>555 nm</b> | <b>Thickness ( <math>\mu</math> m)</b> | <b>Nanoclay content (wt.%)</b> | <b>Ref</b> |
|--------------------------|-----------------------|-------------------|---------------|----------------------------------------|--------------------------------|------------|
| LAP-PVA 25 $\mu$ m       | 81                    | 95-98%            | 96            | 25                                     | 45                             | 54         |
| MTM-PVA                  | 81                    | 85-92%            | 90            | 35-55                                  | 47.8                           | 55         |
| MTM-CS                   | 100                   | 50-80%            | 68            | /                                      | 65                             | 32         |
| SUM-PVA 25 $\mu$ m       | 150                   | 86-90%            | 89            | 25                                     | 50                             | 54         |
| LDH-CS                   | 160                   | 22-21%            | 38            | /                                      | /                              | 57         |
| LDH-ALG-Ca <sup>2+</sup> | 194                   | 74-94%            | 86            | 19                                     | 10                             | 20         |
| NTS-PVA 25 $\mu$ m       | 215                   | 50-72%            | 63            | 25                                     | 76                             | 55         |
| MTM-PVA 9 $\mu$ m        | 219                   | 18-68%            | 58            | 9                                      | 70                             | 35         |
| NFC-VER 13 $\mu$ m       | 245                   | 60-70             | 66            | 13                                     | 10                             | 57         |
| MTM-PVA 20 $\mu$ m       | 248                   | 40-70%            | 60            | 20                                     | 70                             | 33         |

|                                                            |        |          |    |    |    |           |
|------------------------------------------------------------|--------|----------|----|----|----|-----------|
| NFC-VER 13 $\mu\text{m}$                                   | 257    | 70-79    | 72 | 13 | 5  | 58        |
| Mica film 25 $\mu\text{m}$                                 | 259    | 37.8-65% | 56 | 25 | 60 | 54        |
| <b>MMT-ALG-Ca<sup>2+</sup> 29 <math>\mu\text{m}</math></b> | 265.3  | 75-90%   | 87 | 29 | 40 | This work |
| <b>MMT-ALG-Ni<sup>2+</sup> 30 <math>\mu\text{m}</math></b> | 275.85 | 72-88%   | 84 | 30 | 40 | This work |
| <b>MMT-ALG-Co<sup>2+</sup> 26 <math>\mu\text{m}</math></b> | 278.2  | 62-86%   | 70 | 26 | 40 | This work |
| <b>MMT-ALG-Mn<sup>2+</sup> 29 <math>\mu\text{m}</math></b> | 288    | 62-87%   | 85 | 29 | 40 | This work |
